# Supplementary material for: Enhancing the upconversion luminescence properties of Er3+–Yb3+ doped yttrium molybdate through Mg2+ incorporation: effect of laser excitation power on temperature sensing and heat generation
Source: Royal Society of Chemistry journal article supplement (doi:10.1039/c9nj00760a), 2019-01-01
Supplement: c9nj00760a1.pdf [file c9nj00760a1.pdf]

## Electronic Supplementary Material (ESI)

### **Enhancing Upconversion Luminescence Properties of Er<sup>3+</sup>-Yb<sup>3+</sup> Doped Yttrium Molybdate through Mg<sup>2+</sup> Incorporation: Effect of Laser Excitation Power on Temperature Sensing and Heat Generation**

**Shriya Sinha<sup>a</sup>, Manoj K. Mahata<sup>a, b, \*</sup> and Kaushal Kumar<sup>a</sup>**

*<sup>1</sup>Optical Materials & Bio-imaging Research Laboratory, Department of Applied Physics,  
Indian Institute of Technology (Indian School of Mines) Dhanbad-826004, India*

*<sup>2</sup>Second Institute of Physics, University of Göttingen, Friedrich-Hund-Platz 1, 37077  
Göttingen, Germany*

---

\*Corresponding author's e-mail address: manoj\_physics@hotmail.com

**Table S1:** Comparison of maximum UC QY measured for different materials at their corresponding saturation regime of power density.

| Sample                                                     | Power density (W/cm <sup>2</sup> ) | Total QY (%) | References   |
|------------------------------------------------------------|------------------------------------|--------------|--------------|
| SrLa <sub>2</sub> (MoO <sub>4</sub> ) <sub>4</sub> : Er/Yb | 45                                 | 2.99         | 1            |
| La <sub>2</sub> O <sub>2</sub> S: Er/Yb                    | 13                                 | 5.83         | 2            |
| NaYF <sub>4</sub> : Er/Yb                                  | 20                                 | 3.0          | 3            |
| SrF <sub>2</sub> : Er/Yb                                   | 388                                | 0.0057       | 4            |
| YMoO <sub>4</sub> : Er/Yb/Mg                               | 35                                 | 2.48         | present work |

**Table S2:** Calculated temperature and the corresponding FIR values at various pump power densities for YMoO<sub>4</sub>: 0.3 mol% Er<sup>3+</sup>- 3 mol% Yb<sup>3+</sup>- 15 mol% Mg<sup>2+</sup> phosphor.

| Power density<br>(W/cm <sup>2</sup> ) | YMoO <sub>4</sub> : 0.3 mol% Er <sup>3+</sup> - 3 mol% Yb <sup>3+</sup> - 15 mol% Mg <sup>2+</sup> |                                           |                                            |
|---------------------------------------|----------------------------------------------------------------------------------------------------|-------------------------------------------|--------------------------------------------|
|                                       | FIR value                                                                                          | Temperature (K)<br>(7 W/cm <sup>2</sup> ) | Temperature (K)<br>(66 W/cm <sup>2</sup> ) |
| 7                                     | 1.472                                                                                              | 285                                       | 304                                        |
| 19                                    | 1.910                                                                                              | 321                                       | 362                                        |
| 30                                    | 2.226                                                                                              | 346                                       | 407                                        |
| 40                                    | 2.424                                                                                              | 363                                       | 434                                        |
| 55                                    | 2.520                                                                                              | 371                                       | 452                                        |
| 66                                    | 2.623                                                                                              | 380                                       | 470                                        |

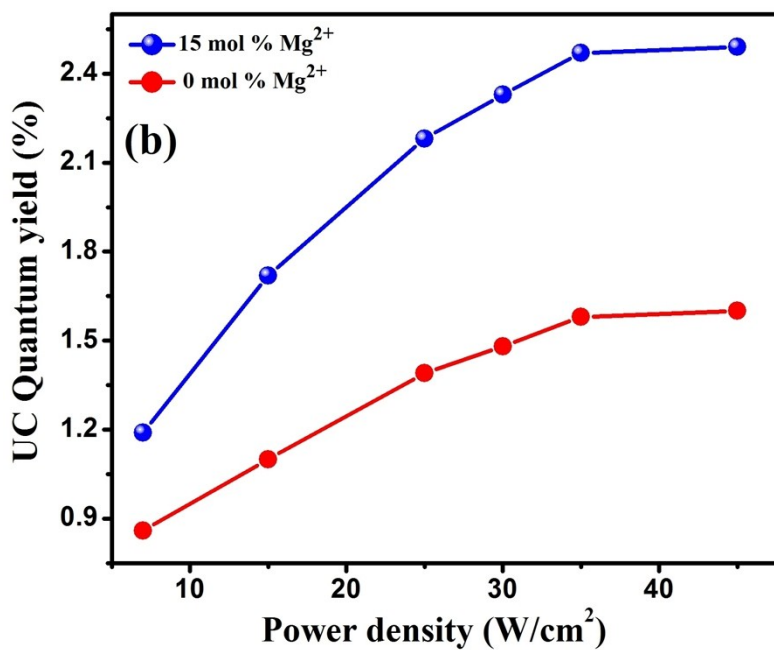

**Fig. S1** Variation of emission quantum efficiency with excitation power densities for YMoO<sub>4</sub>: 0.3 mol% Er<sup>3+</sup>- 3 mol% Yb<sup>3+</sup> and YMoO<sub>4</sub>: 0.3 mol% Er<sup>3+</sup>- 3 mol% Yb<sup>3+</sup>- 15 mol% Mg<sup>2+</sup> phosphors. Maximum quantum efficiency is achieved around 35 W/cm<sup>2</sup>. Beyond this excitation power, a saturation in the quantum yield is observed.

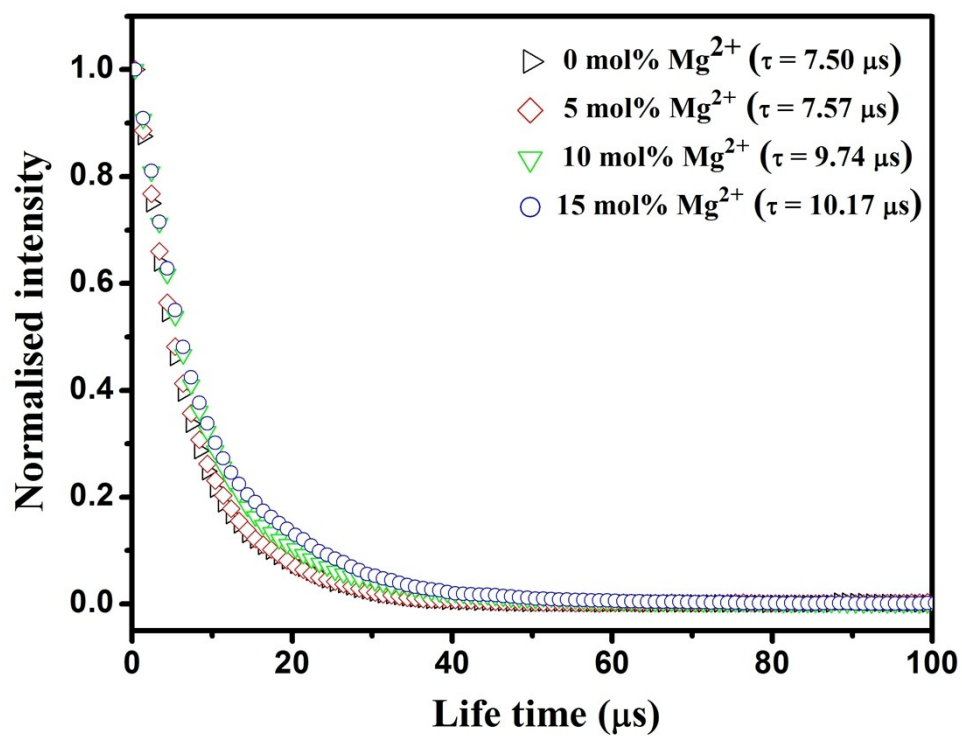

**Fig. S2** Lifetime curves for  ${}^4S_{3/2} \rightarrow {}^4I_{15/2}$  transition of  $\text{Er}^{3+}$  for  $\text{YMoO}_4$ : 0.3 mol%  $\text{Er}^{3+}$ - 3 mol%  $\text{Yb}^{3+}$  phosphor co-doped with different concentrations of  $\text{Mg}^{2+}$  ions (0, 5, 10, and 15 mol% ) under 980 nm light excitation.

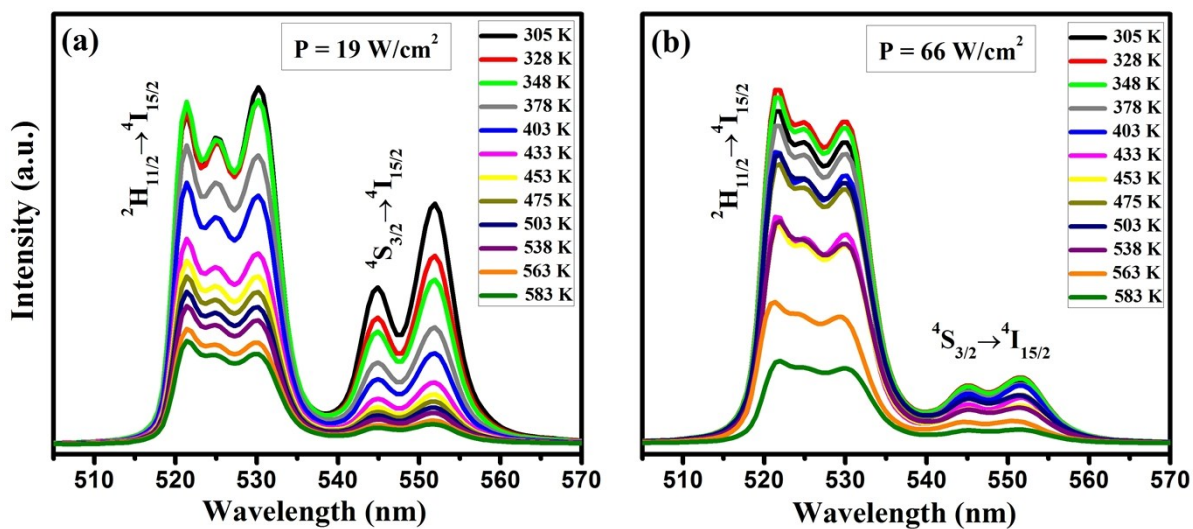

**Fig. S3** Temperature dependent UC emission spectra for 530 nm ( ${}^2\text{H}_{11/2} \rightarrow {}^4\text{I}_{15/2}$ ) and 552 nm ( ${}^4\text{S}_{3/2} \rightarrow {}^4\text{I}_{15/2}$ ) bands of  $\text{YMoO}_4$ : 0.3 mol%  $\text{Er}^{3+}$ - 3 mol%  $\text{Yb}^{3+}$ - 15 mol%  $\text{Mg}^{2+}$  phosphor excited by 980 nm excitation (a) at  $19 \text{ W/cm}^2$  excitation power density; (b) at  $66 \text{ W/cm}^2$  excitation power density.

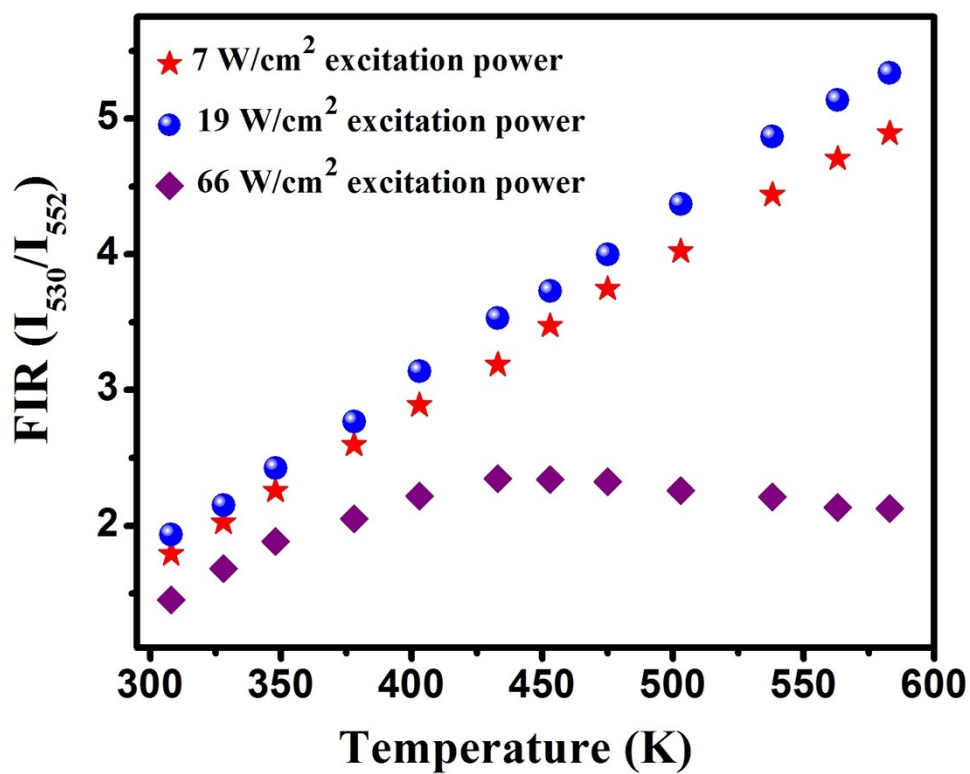

**Fig. S4** Variation of FIR ( $I_{530}/I_{552}$ ) as a function of absolute temperature for  $\text{YMoO}_4$ : 0.3 mol%  $\text{Er}^{3+}$ - 3 mol%  $\text{Yb}^{3+}$ - 15 mol%  $\text{Mg}^{2+}$  phosphor at three different excitation power density (7, 19 and 66  $\text{W}/\text{cm}^2$ ).

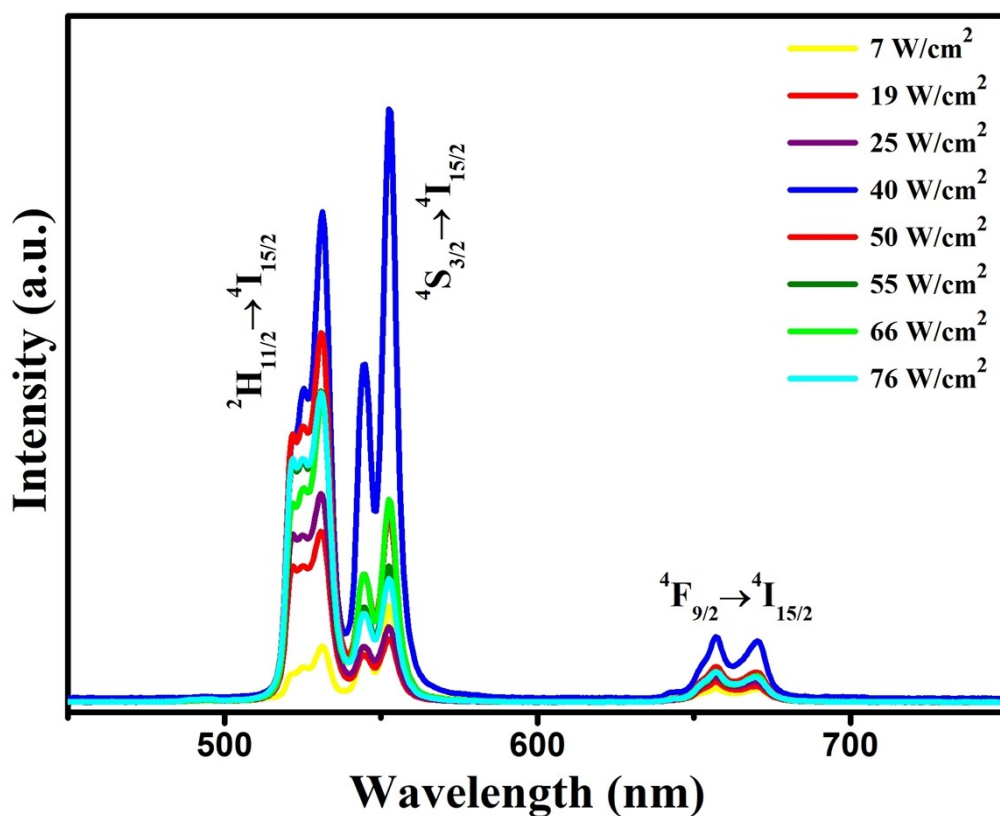

**Fig. S5** Variation of UC emission intensity at different excitation power densities for YMoO<sub>4</sub>: 0.3 mol% Er<sup>3+</sup>- 3 mol% Yb<sup>3+</sup>- 15 mol% Mg<sup>2+</sup> phosphor.

## References

1. S. Sinha, K. Kumar, *Opt. Mater.*, 2018, 75, 770.
2. M. Pokhrel, A. K. Gangadharan, D. K. Sardar, *Materials Letters*, 2013, 99, 86.
3. J. C. Boyer, F. C. J. M. van Veggel, *Nanoscale*, 2010, 2, 1417.
4. S. Balabhadra, M.L. Debasu, C.D.S. Brites, R.A.S. Ferreira, L.D. Carlos, *J. Lumin.* 189 2017, 189, 64.
